# Supplementary material
Source: Springer Nature journal article supplement (https://www.springermedizin.de/resource/supplementary/12887_2012_744_MOESM1_ESM.pdf/9475870)

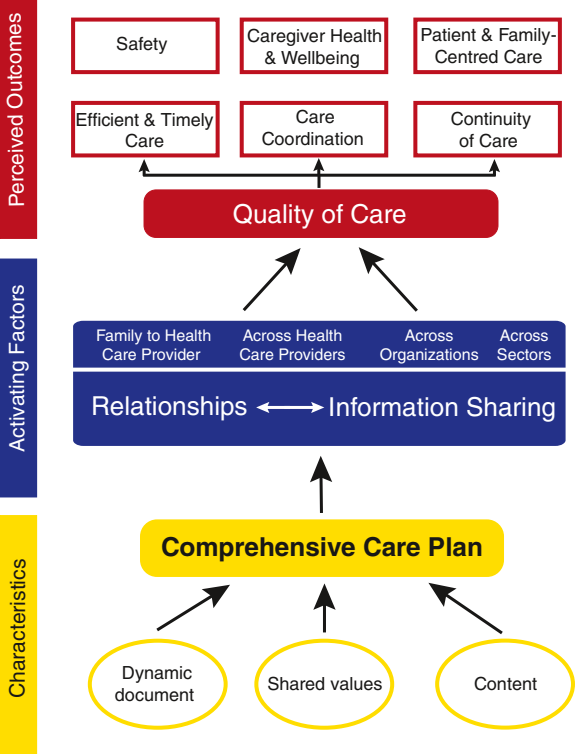

Supplement: MOESM1 [file 9475870]
